# Supplementary material for: lncRNA ADAMTS9-AS2 Controls Human Mesenchymal Stem Cell Chondrogenic Differentiation and Functions as a ceRNA
Source: PubMed Central journal article supplement — Mol Ther Nucleic Acids. 2019 Sep 18;18:533–45. doi: 10.1016/j.omtn.2019.08.027 (PMC6838486; doi:10.1016/j.omtn.2019.08.027), 2019-09-18
Supplement: mmc1.pdf [file mmc1.pdf]

**OMTN, Volume 18**

**Supplemental Information**

**lncRNA ADAMTS9-AS2 Controls Human  
Mesenchymal Stem Cell Chondrogenic  
Differentiation and Functions as a ceRNA**

**Ming-Jian Huang, Jing-Yu Zhao, Jia-Jia Xu, Jing Li, Yi-Fu Zhuang, and Xiao-Ling Zhang**

Supplement figure.

- (A) Q-PCR for the expression of lncRNA ADAMTS9-AS2 after three ASO transfection at the indicated time points.
- (B) Sequence pattern diagram for lncRNA ADAMTS9-AS2 and some information like position and length about this lncRNA.

**A**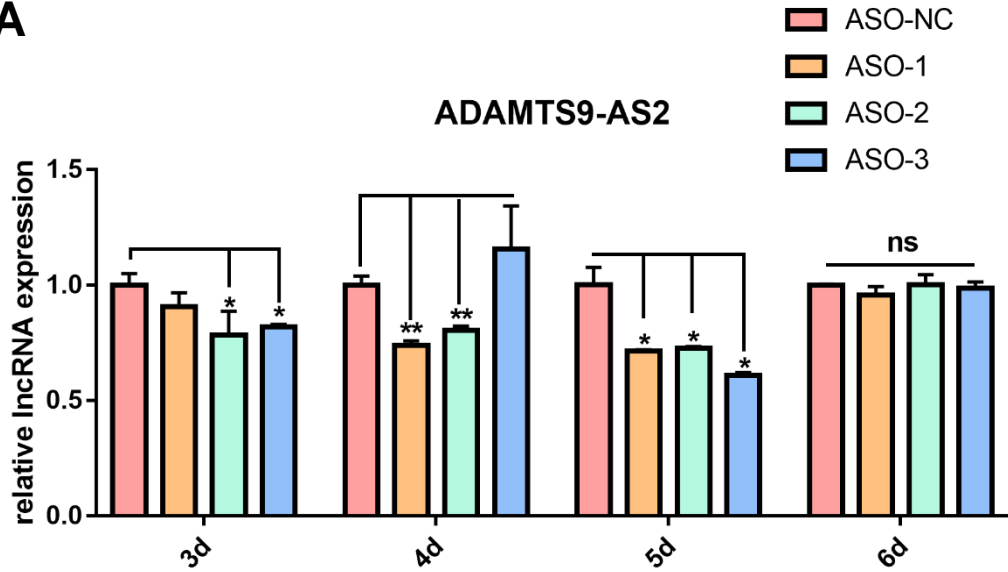**B**

**lncRNA ADAMTS9-AS2**

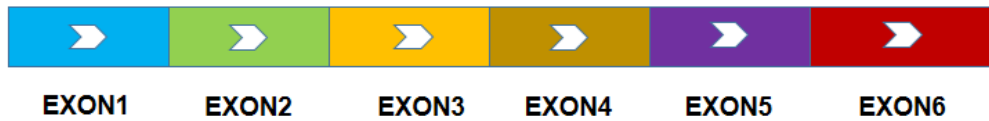

**lncRNA ADAMTS9-AS2 :**

Position: chr3:64684870-65011471

Length: 2258

Strand :+

### The sequence of lncRNA ADAMTS9-AS2:

AAACTTGACGTACACACGCAGTCCTATCCCTACGGTCTGGAATTGGGGTTACTATCTTGAATCTAGGGGCAC  
TCCAGGCTCTGGGCTCAGACGGCTGGCTTCTGCCTACCCGAGCCTTAACCTTTCAAGGACCAGAAGGATCCAGA  
GCTCTTGCCCTAGGTCTGGGGCAGCGATGACTCACTGCAGCACCCCTCCCACTTCGCCAAGCTGCCGTCTCCG  
CCCACCCCAACAATCTCGACAGCGCATTTCGGGAGCCACGGCTCCGGGCGCTTTGCTGGGGGCTAAAGGGTT  
TATCCCTTCTTGAATCCCAGCAGGCTAGAACTACCCCTCCCAGTCTTCAGGCTTGCCACGCTCTCCACCCGA  
TCCTTCCATTGAAAGGCAGAGAAGGAAGGATGTGCTTGGGAACCTTAAGACCCACGAACGACAGCGCACTGATGG  
AGCAGCCCAGTGTCTGGGGCAAAGTCTCGAGGTTCAATCATTAGGAAGCCTCTGACCAGCCTTACCATGCGC  
TGAGTGAGAAGCTGAGGATAAGGAAAGAGCAAGACCCCAAGAAACCCTGATGTCTGGCTGAAAGCCGAAGCATG  
ACGCAACTTTGCTATATTTCTCTCAACAAGGATTTGTATATTTTCGCTTCTCTCAAGTAACACCTGGACCTG  
CTCCTTCCCTTCAAACGCTGAGGGCTCAGTCTCCAAGTTCCTTTATGAAACAGGGTGTACCATCAGAGACGCAG  
GTATTTATTGAAACCTGCTTTGTGCTGGGCAATGTGCCAGATGTTGGGGATAAAATGGAGACTTCAGAAATGAAG  
ATGCAAAGACAACAGGGGAAACCATATATGTTTATGGACAGTCATGCCAAAGTATGATTGGAAGACAAAAAGATT  
TTTGGCCAATTCAGTCTCACTAACATCTCCATCAAAGGGAAAAACACACATTGTAATAAAGAATTCCTCAAAG  
ACAACCTGAAGACATCTGGGAATTCGAAGCCTGAAAATTCATGAGTTCATAGCAGTGTCTACTAATTCAGT  
ATCTAAAGACAAAAAGGAGAGTCAACTGCGTGCCAAAACCTATTTCTGATGATTTCTCCATCCTAACTTTTCTG  
CCTCTCTGGGGTGGTTATGCCTGTGAAAAACATTGAAGCTGTCAGGAACAGAGTCGGCTTCAAGATTGGAATG  
TCAAAGTAGAGTCTTCTTTCTCAGACCAGAAGGGCTTGGTTGGGTAAGAGTTTCCAGATCTAAATGGAGACA  
GGACTGGGATATAGGAGCTTGTACGGATAAACAACACAAACACCTTGGGTAAGTGATACCAAGAGAGATCAAA  
ATAGGGTAGGAACACGATCCTAAAGCTATGTGAGATACGAAGCCAAGAGACCCTGTCTACAGGCTGATATGTATT  
GCAACCAGAGGCCACCTACACTCAAGAAAATTCTAAATGATGTAATAGTGTGGACACTTCTTTGTAATAATGA  
TCGATATTTTTTTCTTATAGGGATAAAGCTTAAAGCATGGGATGTATCTCCATTAGGAAATATGAAGTGAGTTG  
GTATATTACAGGTAGGTTAGACTGAGATAATTATAAACTGGGCTGATTTTACATAGAGAAGAACTTGATTCCTA  
AAGGTGTTGAAGGACAAGATGGGGACAGTTATTGAAGTGTTGAGGTGCTGTCTTTGTAGTCTGTAGCCTATTAA  
AATAATACACAACCTGAACACAGACCCAAGGAAAGGGTTCTACTCATCGCTAGAATGTAACTCTAAGAAGATAA  
GGATTTTGTCTGCTTCATTTATTACTGTATTTCCAGCTCCTAAAAGAGTGTCCAGCACTTAGTATCTGTTGGTAA  
GTACCTGTTGAATTAATTAACAGTGATGAGACTTTGGAAAGCAGCTAGTCCATCTGTAAGATTGTTTTCTCATC  
TGTGAGATGAGTCAGTTAGATTAGATGTTTTCTAAGCTTATTCTAGTTTTAAAATTGTATATTTCTATAAGAAAT  
GATAAATGAAAAATGTCCATTCCTTTTTCATCTCCATCACCCATCTCACATCTTCCTCAGTGCCTATGTGATCT  
GTTTGAGTATAACCAGGTGTACAAAAGTACTAAGTGATATGAGATGACTTCAGTAGTCCAGGGACTCTTCTTCC  
CCCACTCTGTAAGAGTTATTTGCTTAATTTAATGTACATTATAAAAAACAGAAAAAAAAAAAAAAAAAAAAAAAA  
AAAAAAA
